# Supplementary material for: Structural basis for the GTP specificity of the RNA kinase domain of fungal tRNA ligase
Source: PubMed Central journal article supplement — Nucleic Acids Res. 2017 Nov 20;45(22):12945–53. doi: 10.1093/nar/gkx1159 (PMC5728400; doi:10.1093/nar/gkx1159), 2017-11-20
Supplement: gkx1159_supp.pdf [file gkx1159_supp.pdf]

## Supplemental Material

### Structural basis for the GTP specificity of the RNA kinase domain of fungal tRNA ligase

Barbara S. Remus, Yehuda Goldgur, and Stewart Shuman

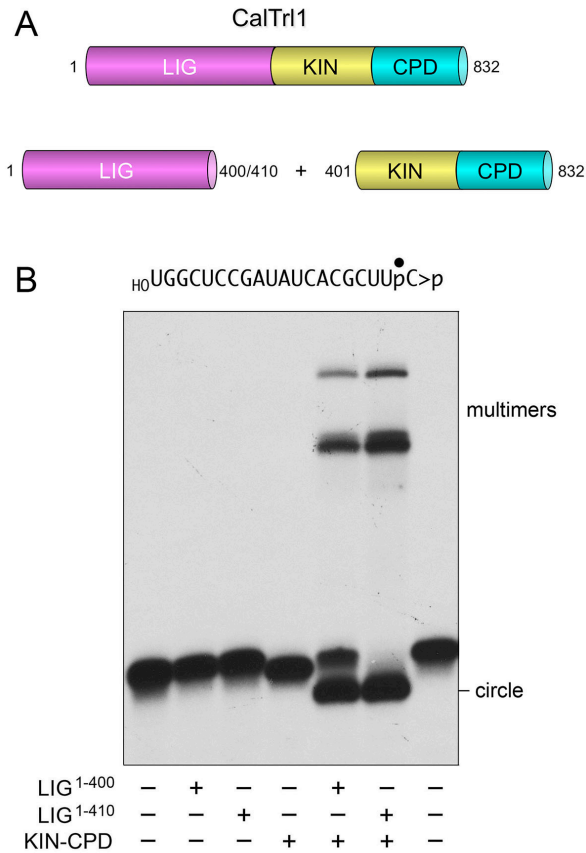

Figure S1. *Candida albicans* Trl1. (A) CaTrl1 consists of N-terminal ligase (LIG), central kinase (KIN), and C-terminal cyclic phosphodiesterase (CPD) modules. The indicated LIG and KIN-CPD fragments were produced as separate recombinant proteins. (B) Reconstitution of RNA end-joining with isolated LIG and KIN-CPD domains. Reaction mixtures (10  $\mu\text{l}$ ) containing 50 mM Tris-HCl (pH 7.5), 50 mM NaCl, 2 mM DTT, 10 mM  $\text{MgCl}_2$ , 100  $\mu\text{M}$  GTP, 20 nM  $^{32}\text{P}$ -labeled 20-mer  $\text{HO}^{\bullet}\text{RNA}>\text{p}$  substrate (depicted at top, with the  $^{32}\text{P}$ -label denoted by  $\bullet$ ), and 100 nM LIG or KIN-CPD domains (where indicated by +) were incubated at 22°C for 30 min. The reactions were quenched with an equal volume of 90% formamide, 30 mM EDTA. The labeled RNAs were resolved by urea-PAGE. An autoradiogram of the gel is shown. The positions of the ligated circle and multimer products are indicated on the *right*.

Table S1  
Crystallographic data and refinement statistics

|                                                                     | Native Cal KIN                 | Hg derivative                     |
|---------------------------------------------------------------------|--------------------------------|-----------------------------------|
| <b>Data collection</b>                                              |                                |                                   |
| Beamline                                                            | APS 24-ID-C                    | APS 24-ID-C                       |
| Space group                                                         | $P2_12_12_1$                   | $P2_12_12_1$                      |
| Cell dimensions<br>a, b, c (Å)<br>$\alpha$ , $\beta$ , $\gamma$ (°) | 49.9, 56.3, 82.6<br>90, 90, 90 | 51.76, 51.15, 88.96<br>90, 90, 90 |
| Resolution (Å)                                                      | 50–2.2 (2.25–2.2)              | 50–2.3 (2.35–2.3)                 |
| Wavelength (Å)                                                      | 0.9791                         | 0.9791                            |
| $R_{pim}$                                                           | 0.081 (0.336)                  | 0.055 (0.212)                     |
| CC(1/2)                                                             | 0.984 (0.715)                  | 0.991 (0.916)                     |
| $\langle I \rangle / \langle \sigma I \rangle$                      | 11.0 (1.5)                     | 15.1 (2.3)                        |
| Completeness (%)                                                    | 90.4 (70.1)                    | 99.0 (96.4)                       |
| Redundancy                                                          | 2.2 (1.4)                      | 3.9 (2.8)                         |
| Unique reflections                                                  | 12608                          | 11700                             |
| <b>Phasing</b>                                                      |                                |                                   |
| Number of Hg sites                                                  |                                | 5                                 |
| Figure of merit                                                     |                                | 0.655                             |
| <b>Refinement</b>                                                   |                                |                                   |
| $R_{work} / R_{free}$                                               | 0.187 / 0.252                  |                                   |
| B-factors (Å <sup>2</sup> ) Average / Wilson                        | 40.8 / 30.5                    |                                   |
| RMS deviations<br>bond lengths (Å)<br>bond angles (°)               | 0.007<br>0.949                 |                                   |
| Ramachandran plot<br>% favored<br>% allowed<br>outliers             | 97.6<br>2.4<br>0               |                                   |
| <b>Model contents</b>                                               |                                |                                   |
| Protomers / ASU                                                     | 1                              |                                   |
| Protein residues                                                    | 213                            |                                   |
| Mg ion                                                              | 1                              |                                   |
| Ligand                                                              | GDP                            |                                   |
| Water                                                               | 111                            |                                   |
| <b>PDB ID</b>                                                       | 5U32                           |                                   |

Values in parentheses refer to the highest resolution shell.

$R_{free}$  set consists of 10% of data chosen randomly against which structures were not refined.

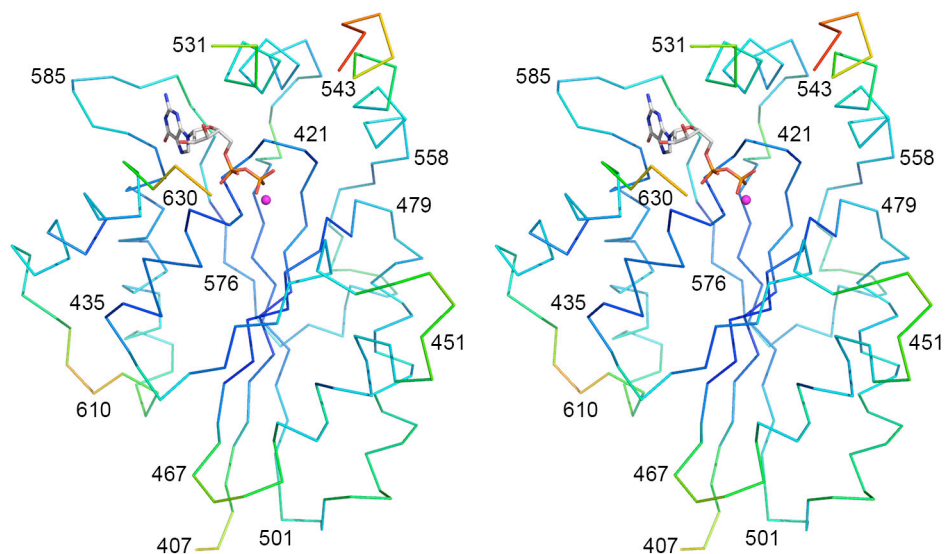

Figure S2. Stereo view of a main-chain trace of the kinase tertiary structure, colored according to the B-factors of the  $C\alpha$  atoms, from the lowest values in dark blue (Val416/Thr427/Ala508 = 23.7/25.9/25.8) to the highest in red-orange (Leu543/Asp544/Glu545 = 86.3/85.3/86.5). GDP and  $Mg^{2+}$  are depicted as a stick model and magenta sphere, respectively.

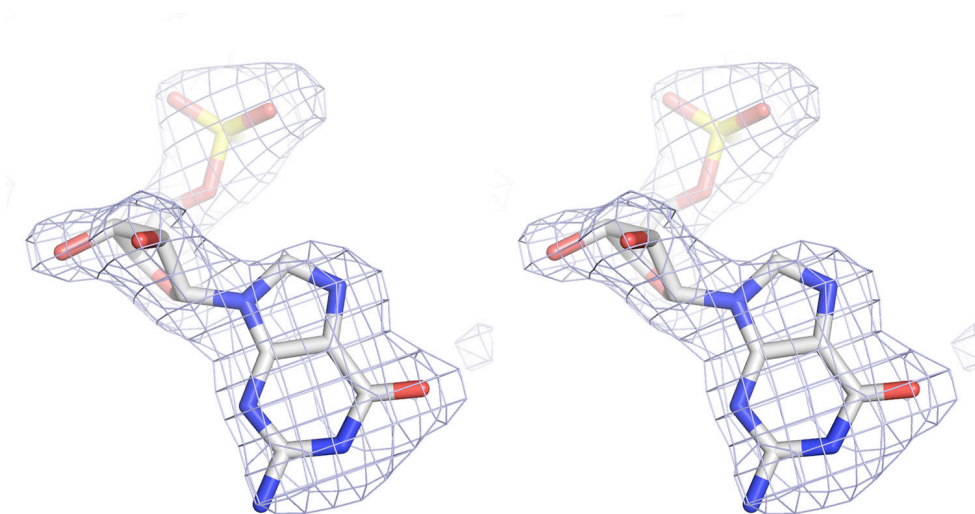

Figure S3. **Electron density for a guanosine nucleotide in the kinase active site.** Shown is a stereo view of a simulated annealing omit map (Fo-Fc) of the electron density for the GMP moiety of GDP bound to the *Candida* Trl1 kinase domain, colored in light blue mesh and contoured at  $3\sigma$ . The map was calculated after GDP, waters, and magnesium ion were omitted and the model was subject to torsion angle simulated annealing from 5000 K. The nucleotide is shown as a stick model in an orientation that highlights the electron density for the guanine nucleobase. (The GDP beta phosphate density and model are slabbed out for simplicity.)

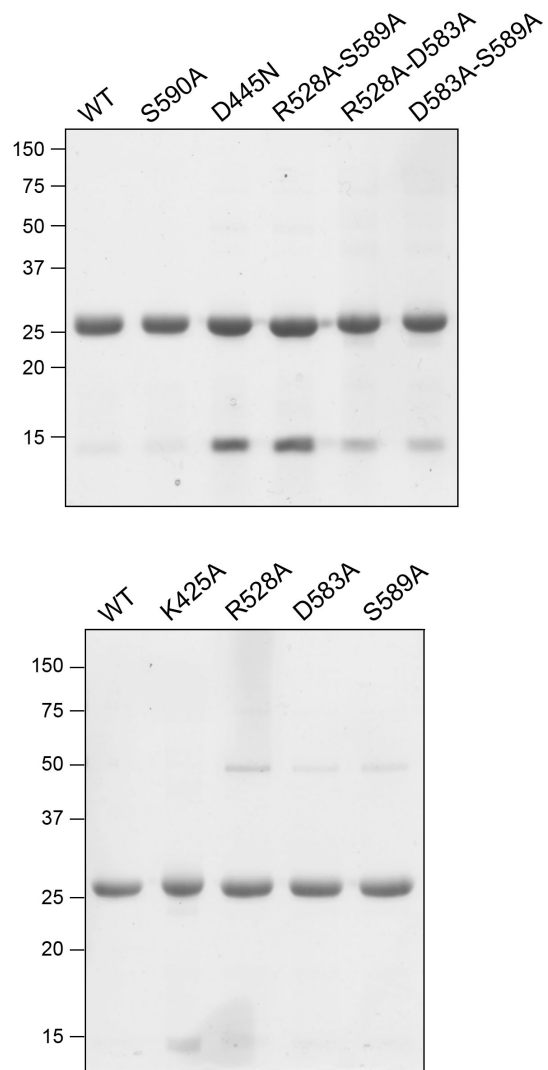

Figure S4. ***Candida* Trl1 KIN mutants.** Aliquots (4  $\mu$ g) of the recombinant wild-type KIN domain (WT) and the indicated mutants were analyzed by SDS-PAGE. The Coomassie blue-stained gel is shown. The positions and sizes (kDa) of marker polypeptides are indicated on the *left*.
